# Supplementary material
Source: PubMed Central journal article supplement (PMC4421067)
Supplement: AEM.00227-15_zam999116303so1.pdf [file AEM.00227-15_zam999116303so1.pdf]

## Supplemental Material

### A Chloride-Inducible Expression Vector for Delivery of Antimicrobial Peptides Against Antibiotic-Resistant *Enterococcus faecium*

Kathryn Geldart, Juan Borrero, and Yiannis N. Kaznessis<sup>#</sup>

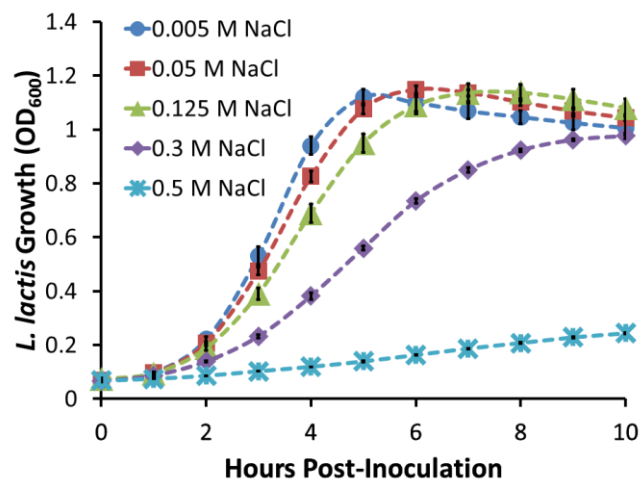

**Figure S1.** *L. lactis* pNZCA3 growth in modified GM17 medium with 0.005 M, 0.05 M, 0.125 M, 0.3 M, and 0.5 M NaCl. Error bars represent +/- one standard deviation calculated from biological triplicates.

<sup>#</sup> Address correspondence to Yiannis Kaznessis, yiannis@umn.edu.

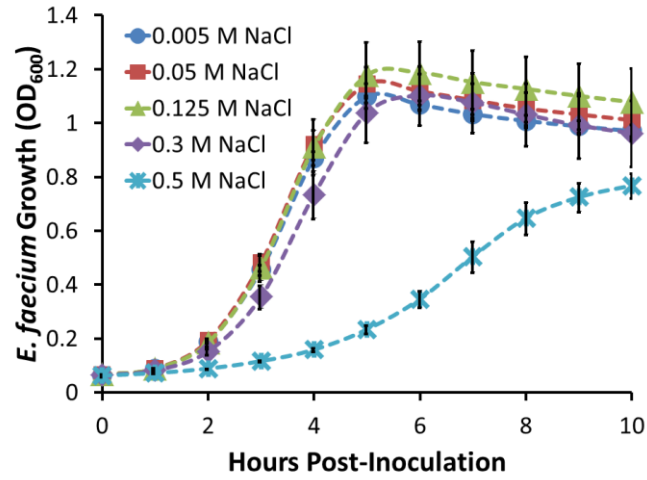

**Figure S2.** *E. faecium* 8-E9 growth in modified GM17 medium with 0.005 M, 0.05 M, 0.125 M, 0.3 M, and 0.5 M NaCl. Error bars represent +/- one standard deviation calculated from biological triplicates.
